# Supplementary material for: Targeted degradation of the HPV oncoprotein E6 reduces tumor burden in cervical cancer
Source: PubMed Central journal article supplement (PMC11507957; doi:10.1101/2024.10.17.618959), 2024-10-17

Supplemental figure 1 . Biophysical characterization of full nanobody panel

**a**

**Yeast selections**

Live gate  
FSC-A  
vs.  
SSC-A

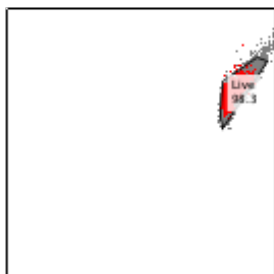

Ungated  
- (Live)  
- (Singlets)  
Q2: FITC-A+, APC-A+

FSC-A :: FSC-A  
x  
SSC-A :: SSC-A

Singlets  
FSC - A  
vs.  
FSC - H

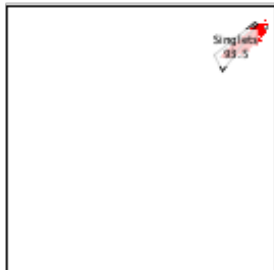

Live  
- (Singlets)  
Q2: FITC-A+, APC-A+

FSC-A :: FSC-A  
x  
FSC-H :: FSC-H

Double +  
quadrant  
Comp-  
FITC - A  
vs.  
APC - A

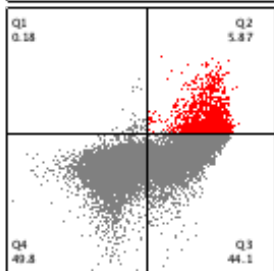

Live  
Singlets  
Live  
Singlets  
Q2: FITC-A+, APC-A+

FL1-A :: FITC-A  
x  
FL4-A :: APC-A

**b**

| Nanobody clone | Melting temp (°C) |
|----------------|-------------------|
| A2             | 60 ± 1.4          |
| A4             | 69.7 ± 1.1        |
| A5             | 46 ± 0.23         |
| A6             | 77.2 ± 1.7        |
| B7             | 72.4 ± 0.78       |
| B8             | 77.6 ± 0.63       |
| B11            | 78.5 ± 0.46       |
| C2             | 74.8 ± 0.61       |
| C8             | 74.8 ± 0.46       |
| C9             | 69.5 ± 1.1        |
| C11            | 72.5 ± 1.3        |

Supplemental figure 2 . Quantified colony formation screen.

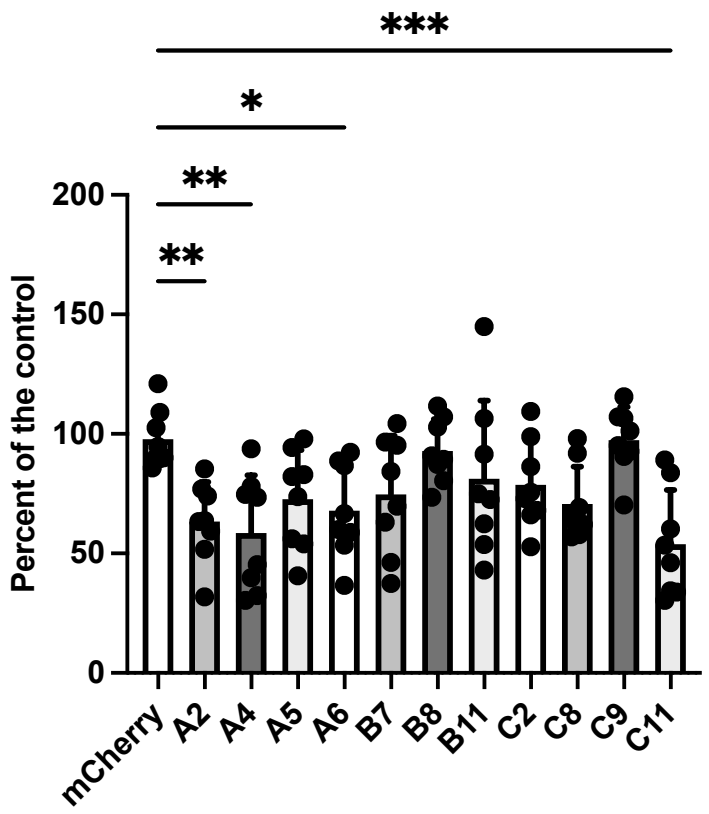

Supplemental figure 3 . Quantified Annexin-V and propidium iodide apoptosis screen.

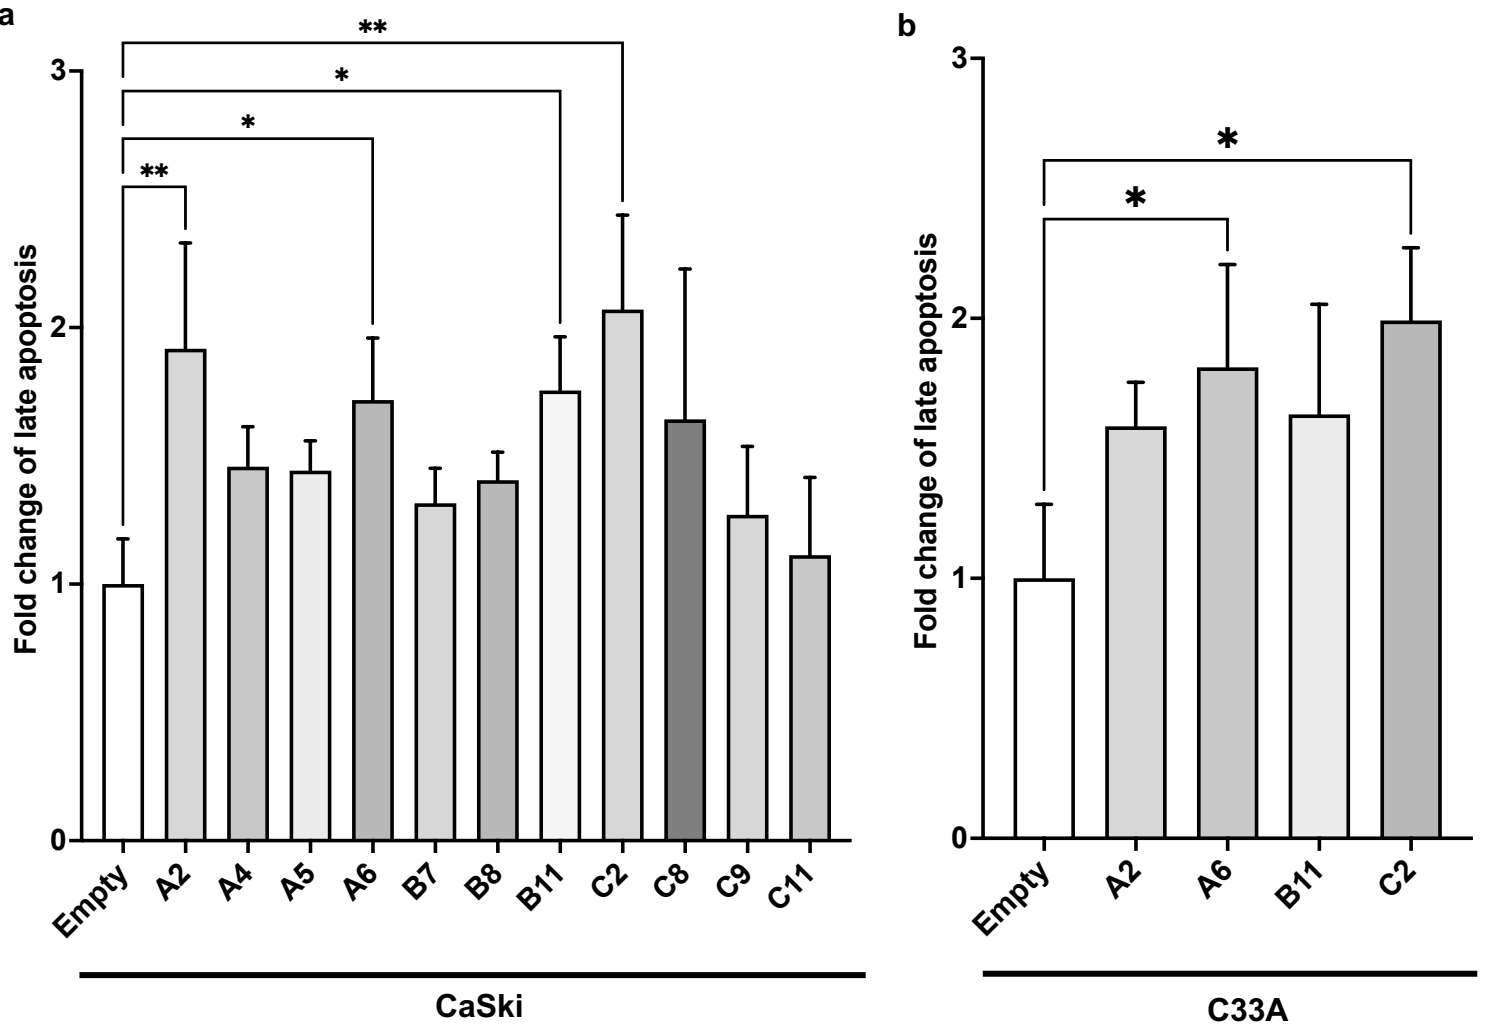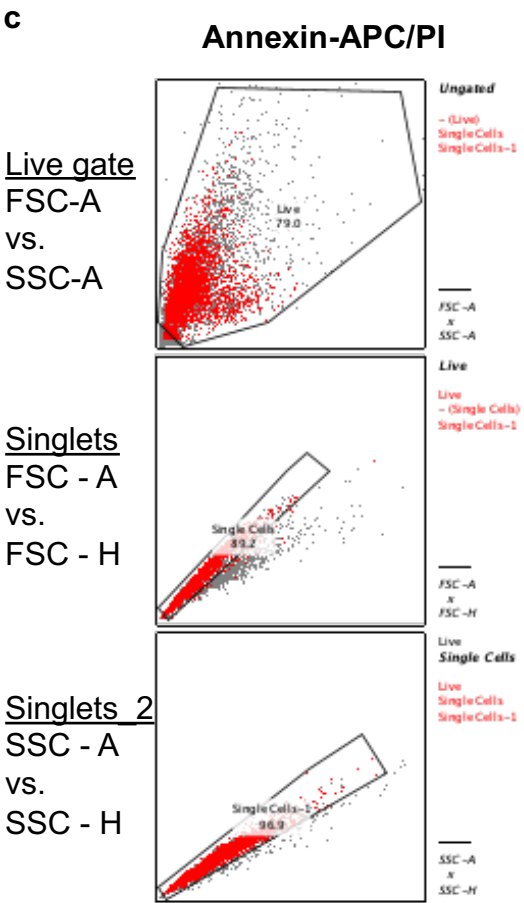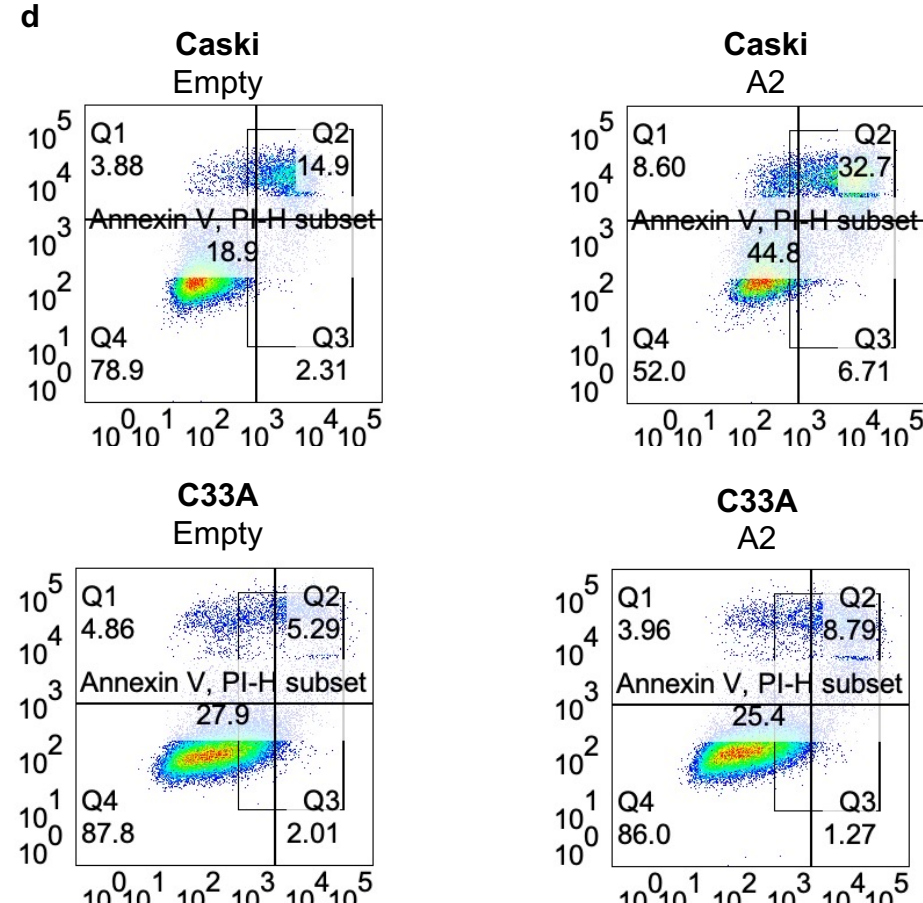

Supplemental figure 4. ISG56 screen and dose-dependent relationship of nanobody C11 on ISG56 induction.

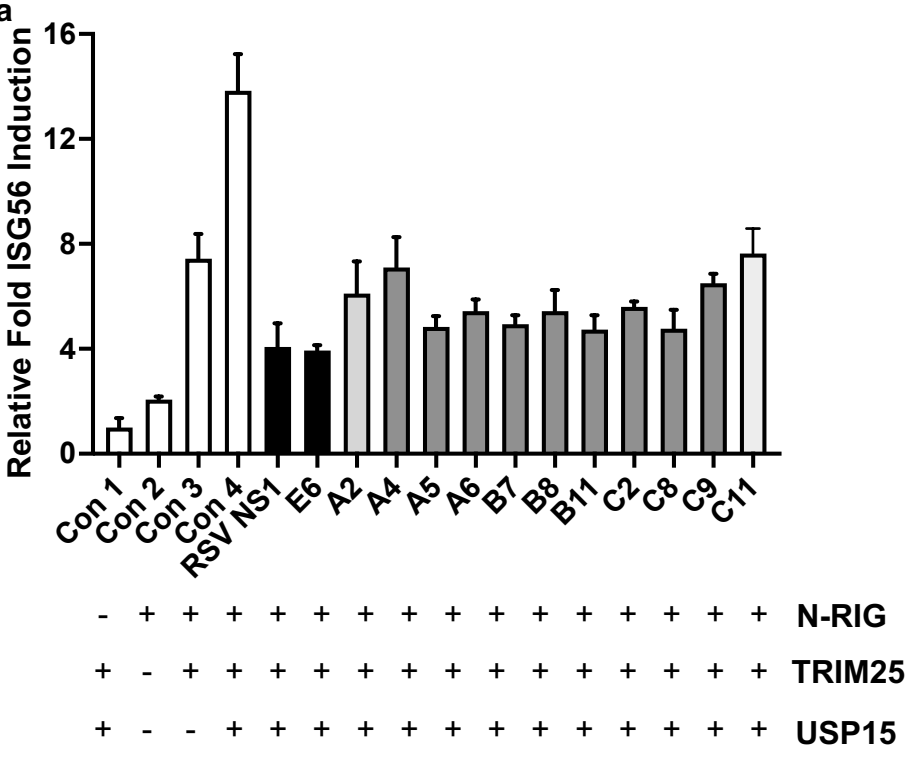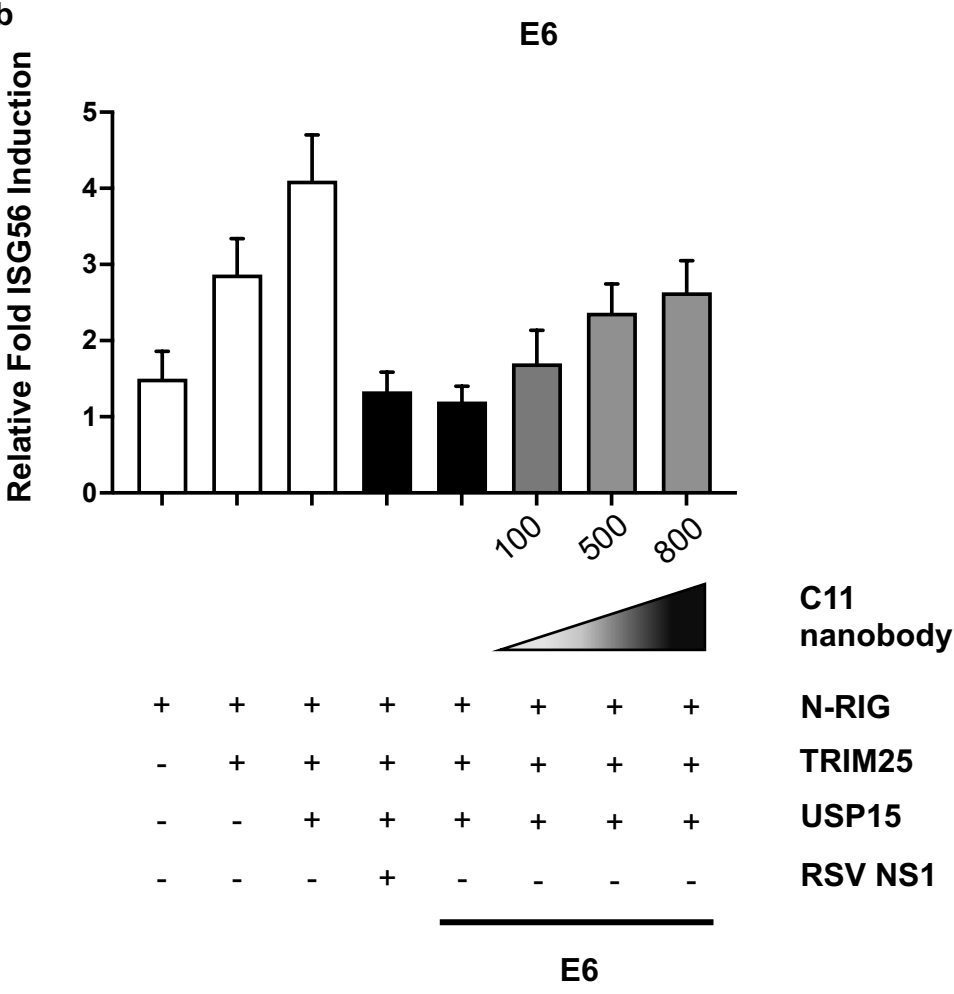

Supplemental figure 5. PROTAC<sup>E6</sup> induction of IFNB mRNA levels

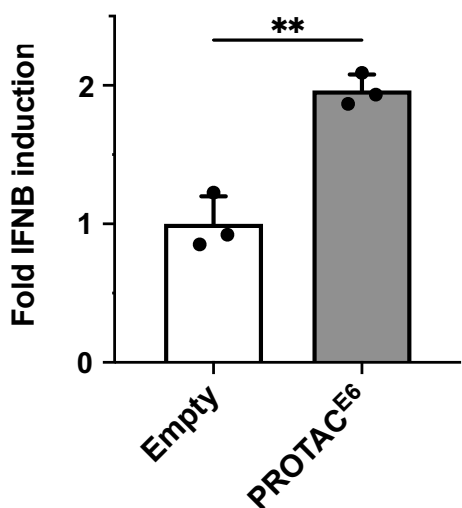

Supplemental figure 6. Mouse body weight

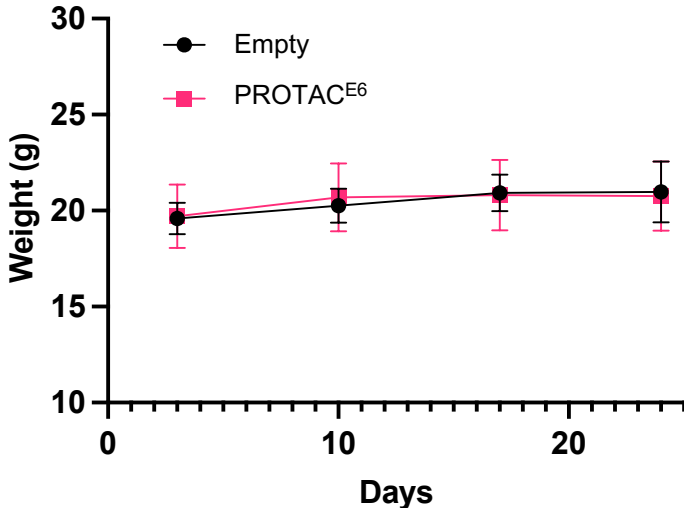

Supplement: media-1.pdf [file media-1.pdf]
